# Supplementary material
Source: publisher figshare collection journal article supplement (https://acs.figshare.com/ndownloader/files/22616369)
Supplement: Supplementary file 1 [file 22616369]

Supporting Information

Orientational Relaxation of Poly(propylene  
imine) Dendrimers at Different pH

Shilpa Gupta and Parbati Biswas\*

*Department of Chemistry, University of Delhi, Delhi-110007, India*

\*E-mail: [pbiswas@chemistry.du.ac.in](mailto:pbiswas@chemistry.du.ac.in)

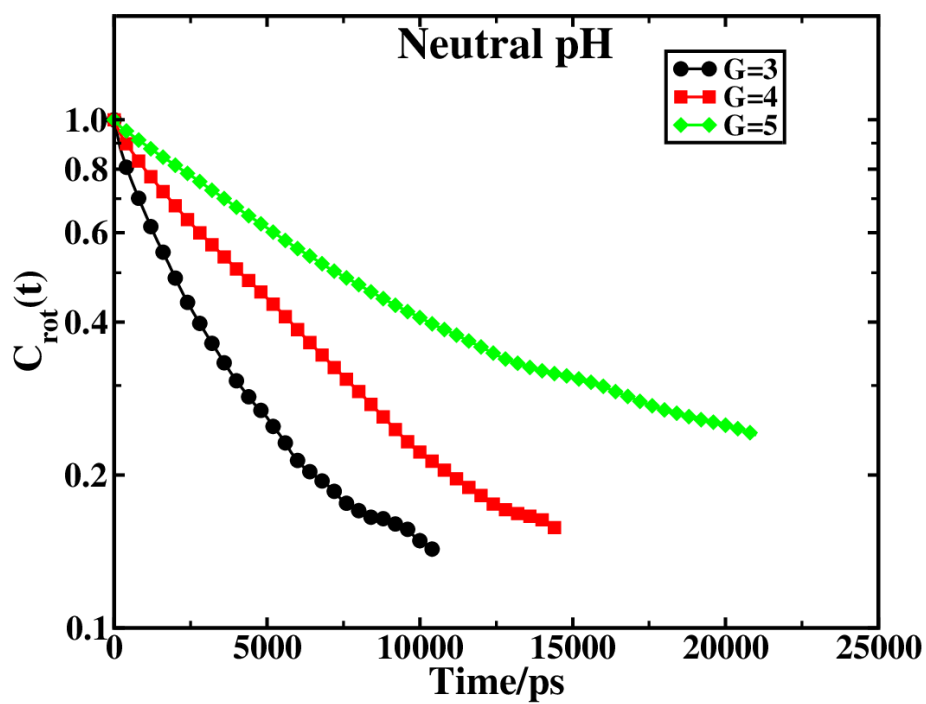

Figure S1: Semi-logarithmic plot of rotational autocorrelation function (ACF) as a function of time for DAB-dendr- $(NH_2)_x$  at neutral pH.

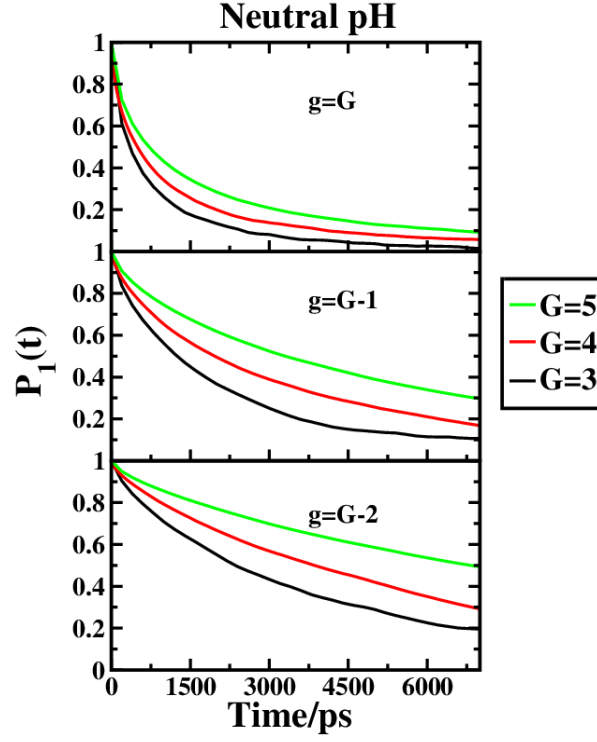

Figure S2:  $P_1(t)$  as a function of time for the segments of the generations,  $g = G$ ,  $g = G - 1$ , and  $g = G - 2$  for  $G = 3$  to  $G = 5$  dendrimers at neutral pH.

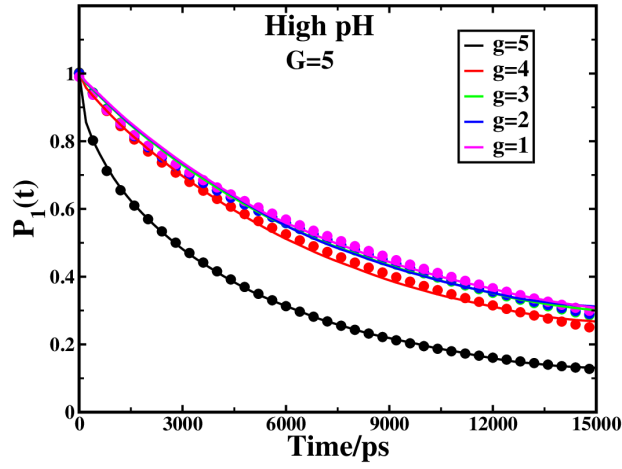

Figure S3:  $P_1(t)$  as a function of time for  $G = 5$  DAB-dendr- $(NH_2)_x$  at high pH.

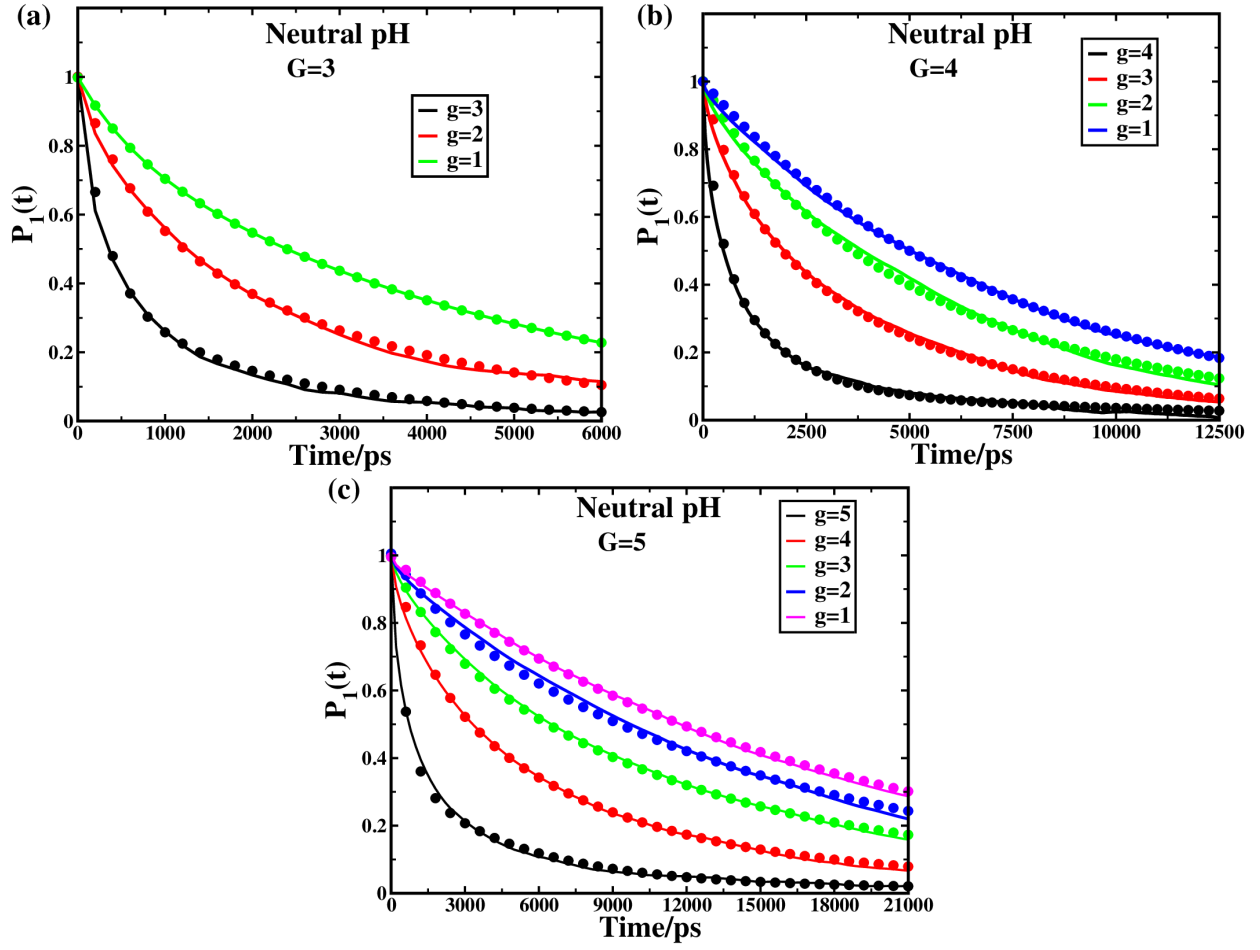

Figure S4:  $P_1(t)$  as a function of time for (a)  $G = 3$ , (b)  $G = 4$ , and (c)  $G = 5$  DAB-dendr- $(NH_2)_x$  at neutral pH condition.

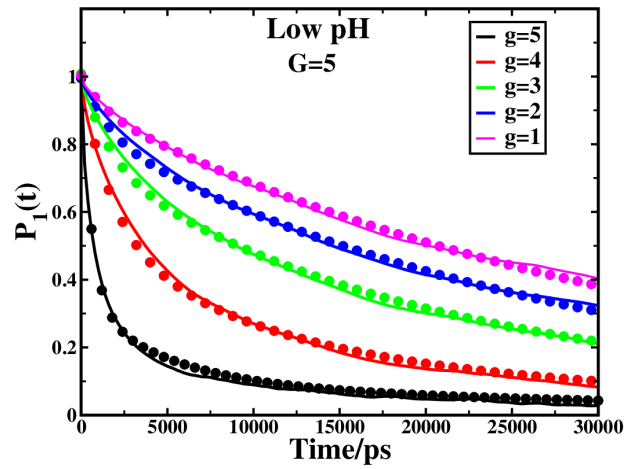

Figure S5:  $P_1(t)$  as a function of time for  $G = 5$  DAB-dendr- $(NH_2)_x$  at low pH condition.

**Table S1:** The approximation of  $P_1(t)$  by a sum of three exponential terms at high pH.  $\tau_r^G$  is the rotational time of the dendrimer as a whole,  $\tau_{in}$  is the characteristic time corresponding to the local small-scale (segmental) mobility, and  $\tau_{br}$  is the pulsation time for a dendrimer branch.  $C_r$ ,  $C_{in}$ , and  $C_{br}$  are the relative amplitudes of the characteristic times  $\tau_r^G$ ,  $\tau_{in}$ , and  $\tau_{br}$ , respectively.

| Generation | $g$ | $\tau_r^G/\text{ps}$ | $C_r$ | $\tau_{in}/\text{ps}$ | $C_{in}$ | $\tau_{br}/\text{ps}$ | $C_{br}$ |
|------------|-----|----------------------|-------|-----------------------|----------|-----------------------|----------|
| $G = 3$    | 3   | 2660                 | 0.03  | 280                   | 0.32     | 1755                  | 0.65     |
|            | 2   |                      | 0.13  | 1100                  | 0.11     | 1994                  | 0.76     |
|            | 1   |                      | 0.10  | 1100                  | 0.13     | 2000                  | 0.77     |
| $G = 4$    | 4   | 6597.6               | 0.045 | 300.4                 | 0.275    | 3287.4                | 0.68     |
|            | 3   |                      | 0.09  | 1150                  | 0.18     | 5191.5                | 0.73     |
|            | 2   |                      | 0.11  | 1150                  | 0.13     | 5200                  | 0.76     |
|            | 1   |                      | 0.10  | 1147                  | 0.13     | 5715.9                | 0.77     |
| $G = 5$    | 5   | 23094                | 0.13  | 410                   | 0.25     | 5804                  | 0.62     |
|            | 4   |                      | 0.16  | 1350                  | 0.11     | 10000                 | 0.73     |
|            | 3   |                      | 0.16  | 1350                  | 0.11     | 11500                 | 0.73     |
|            | 2   |                      | 0.15  | 1350                  | 0.12     | 11914                 | 0.73     |
|            | 1   |                      | 0.175 | 1300                  | 0.105    | 12000                 | 0.72     |

**Table S2:** The approximation of  $P_1(t)$  by a sum of three exponential terms at neutral pH.  $\tau_r^G$  is the rotational time of the dendrimer as a whole,  $\tau_{in}$  is the characteristic time corresponding to the local small-scale (segmental) mobility, and  $\tau_{br}$  is the pulsation time for a dendrimer branch.  $C_r$ ,  $C_{in}$ , and  $C_{br}$  are the relative amplitudes of the characteristic times  $\tau_r^G$ ,  $\tau_{in}$ , and  $\tau_{br}$ , respectively.

| Generation | $g$ | $\tau_r^G/\text{ps}$ | $C_r$ | $\tau_{in}/\text{ps}$ | $C_{in}$ | $\tau_{br}/\text{ps}$ | $C_{br}$ |
|------------|-----|----------------------|-------|-----------------------|----------|-----------------------|----------|
| $G = 3$    | 3   | 5780                 | 0.035 | 300                   | 0.61     | 1850                  | 0.355    |
|            | 2   |                      | 0.10  | 580                   | 0.31     | 2800                  | 0.59     |
|            | 1   |                      | 0.18  | 600                   | 0.16     | 4318                  | 0.66     |
| $G = 4$    | 4   | 9684                 | 0.10  | 320                   | 0.42     | 1420                  | 0.48     |
|            | 3   |                      | 0.16  | 800                   | 0.26     | 3700                  | 0.58     |
|            | 2   |                      | 0.23  | 1000                  | 0.08     | 5105.5                | 0.69     |
|            | 1   |                      | 0.27  | 1000                  | 0.01     | 6631                  | 0.72     |
| $G = 5$    | 5   | 29053                | 0.03  | 547                   | 0.63     | 4561                  | 0.34     |
|            | 4   |                      | 0.11  | 1350                  | 0.27     | 6596.5                | 0.62     |
|            | 3   |                      | 0.23  | 1350                  | 0.13     | 8952                  | 0.64     |
|            | 2   |                      | 0.25  | 1350                  | 0.07     | 12234                 | 0.68     |
|            | 1   |                      | 0.28  | 1250                  | 0.01     | 14578                 | 0.71     |

Table S3: The approximation of  $P_1(t)$  by a sum of three exponential terms at low pH.  $\tau_r^G$  is the rotational time of the dendrimer as a whole,  $\tau_{in}$  is the characteristic time corresponding to the local small-scale (segmental) mobility, and  $\tau_{br}$  is the pulsation time for a dendrimer branch.  $C_r$ ,  $C_{in}$ , and  $C_{br}$  are the relative amplitudes of the characteristic times  $\tau_r^G$ ,  $\tau_{in}$ , and  $\tau_{br}$ , respectively.

| Generation | $g$ | $\tau_r^G/\text{ps}$ | $C_r$ | $\tau_{in}/\text{ps}$ | $C_{in}$ | $\tau_{br}/\text{ps}$ | $C_{br}$ |
|------------|-----|----------------------|-------|-----------------------|----------|-----------------------|----------|
| $G = 3$    | 3   | 4630                 | 0.03  | 300                   | 0.59     | 1980                  | 0.38     |
|            | 2   |                      | 0.04  | 661                   | 0.35     | 3200                  | 0.61     |
|            | 1   |                      | 0.21  | 600                   | 0.10     | 3945                  | 0.69     |
| $G = 4$    | 4   | 13278                | 0.04  | 300                   | 0.51     | 2234                  | 0.45     |
|            | 3   |                      | 0.115 | 950                   | 0.205    | 3590.7                | 0.68     |
|            | 2   |                      | 0.17  | 1250                  | 0.10     | 5206.7                | 0.73     |
|            | 1   |                      | 0.225 | 1250                  | 0.015    | 6807                  | 0.76     |
| $G = 5$    | 5   | 39793                | 0.09  | 608                   | 0.67     | 4995                  | 0.24     |
|            | 4   |                      | 0.18  | 1700                  | 0.44     | 9100                  | 0.38     |
|            | 3   |                      | 0.35  | 1500                  | 0.24     | 14000                 | 0.41     |
|            | 2   |                      | 0.40  | 1500                  | 0.16     | 22835                 | 0.44     |
|            | 1   |                      | 0.43  | 1250                  | 0.09     | 30356                 | 0.48     |

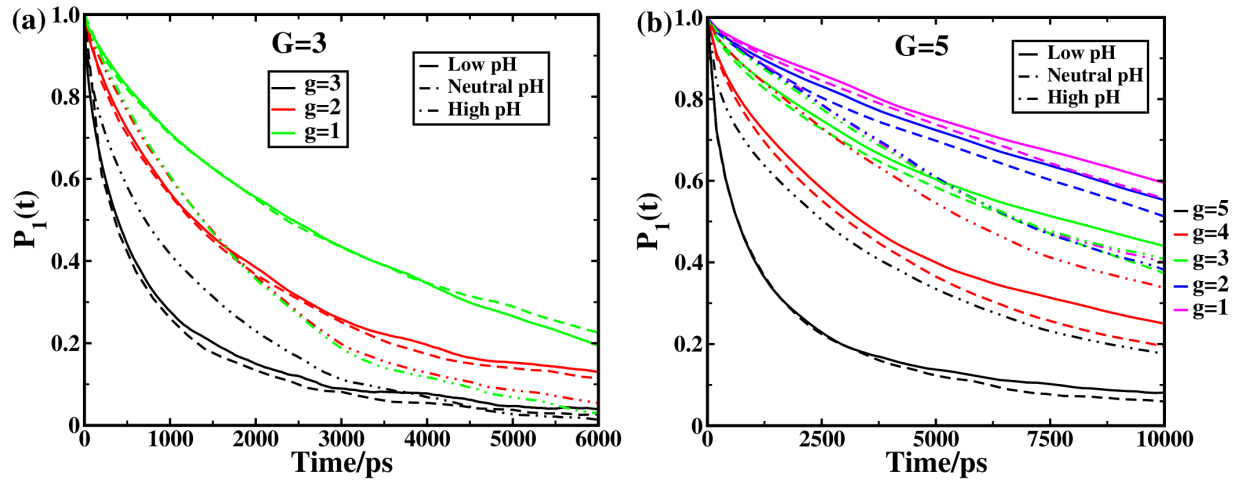

Figure S6:  $P_1(t)$  as a function of time for generations (a)  $G = 3$  and (b)  $G = 5$  of PPI dendrimer at all three pH conditions.

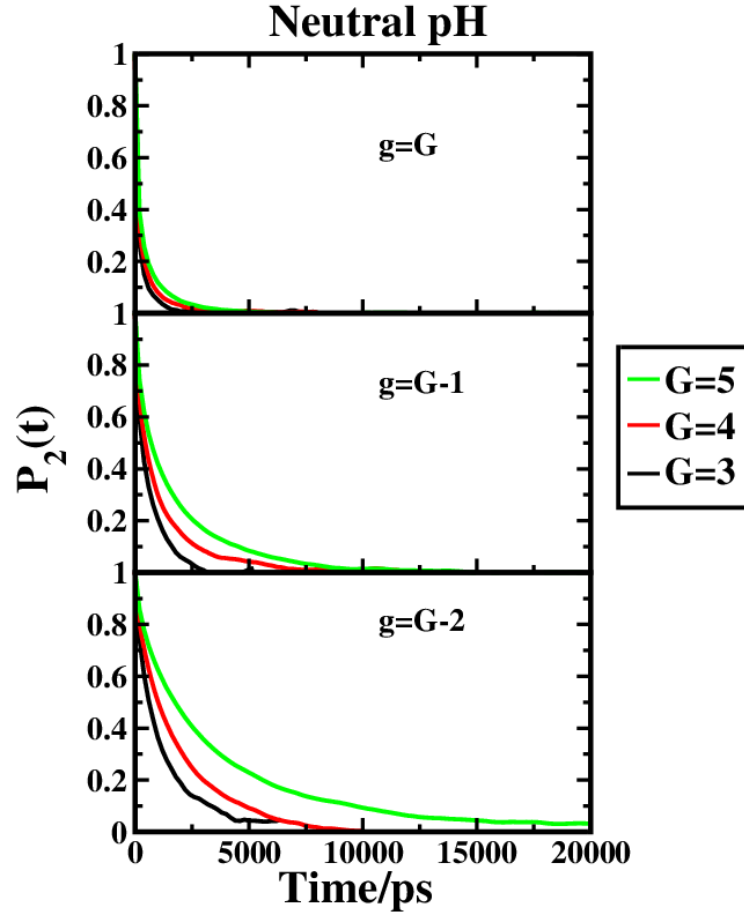

Figure S7: Second-order orientational ACF,  $P_2(t)$  as a function of time for the terminal and various inner generations of DAB-dendr- $(NH_2)_x$  at neutral pH.

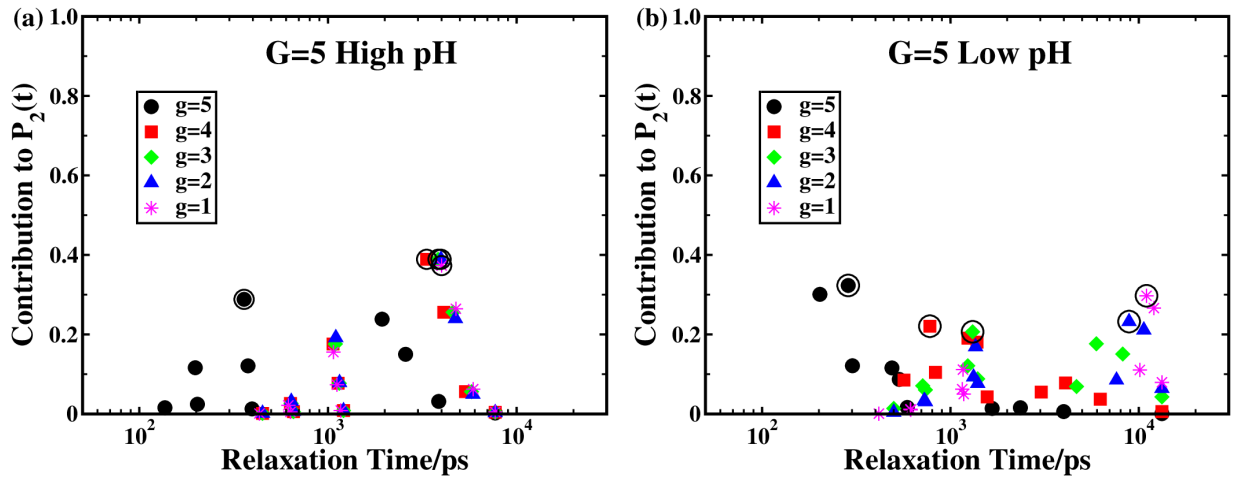

Figure S8: Contributions of the normal modes and their characteristic times to  $P_2(t)$  for generation  $G = 5$  at (a) high pH, and (b) low pH conditions.



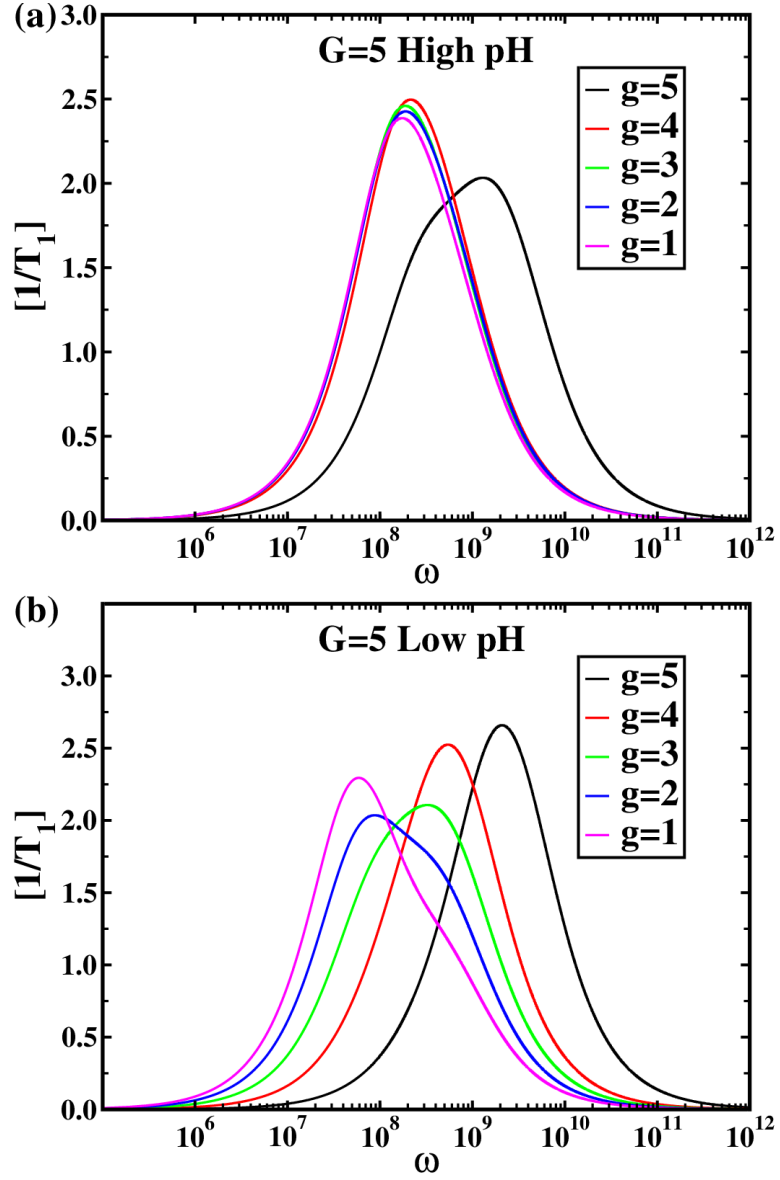

Figure S9: Semi-logarithmic plot of the spin-lattice relaxation rate,  $1/T_1$ , as a function of frequency,  $\omega$ , for generation  $G = 5$  at (a) high pH and at (b) low pH conditions.  $g$  indicates the inner generation for a particular generation  $G$  of the dendrimer.
